# Supplementary material
Source: publisher figshare collection journal article supplement (https://frontiersin.figshare.com/ndownloader/files/31211104)
Supplement: Supplementary file 1 [file 31211104]

Annex Table 2. Species of the different families of lichenized fungi, bryophytes and vascular plants present in the forefront of the Humboldt Peak (Mérida, Venezuela). The table shows the growth forms for each species, as well as their presence in the four study sites along the chronosequence (10, 21, 67 and 109 years) and whether it is a new record for the country (Ven) or an endemic species from Venezuela (Ven), the Páramo ecosystem (P) or tropical Andes (TA). Average cover of each species is shown when it was registered in the 5 x 5 m plots; The presence of each species when recorded with other sampling methods is indicated (In: Inventory by free sampling, FS: Facilitation Sampling, and BSC: Biological Soil Crusts sampling). Absent species in each site are marked as “0.00” and “?” symbolizes species with no confirmed taxonomy.

| Type of organism | Family | Scientific name | Life form / Growth form | Average cover (%) | | | | New record | Endemic |
| --- | --- | --- | --- | --- | --- | --- | --- | --- | --- |
| 10 years | 21 years | 67 years | 109 years |
| Lichenized fungi | Acarosporaceae | *Acarospora* sp. | Crustose | 0.00 | 0.00 | 0.01, In, FS | 0.00 | 0 | 0 |
| Arthrorhaphidaceae | *Arthrorhaphis alpina* | Crustose | 0.00 | 0.08, In, FS | 0.12, In, FS, BSC | 0.004, In | 0 | 0 |
| Cadelariaceae | *Placomaronea fuegiana* | Crustose | 0.00 | 0.00 | In | 0.00 | Ven | 0 |
| Caliciaceae | *Amandinea* aff. *submontana* | Crustose | 0.00 | 0.00 | 0.14, In | 0.75, In | Ven | ? |
| *Amandinea megaspora* | Crustose | 0.00 | 0.00 | 0.00 | 0.01, In | Ven | 0 |
| Cladoniaceae | *Cladonia* aff. *furcata* | Dimorphic | 0.00 | 0.00 | 0.18, In | 0.00 | 0 | ? |
| *Cladonia aleuropoda* | Dimorphic | 0.00 | 0.00 | 0.00 | 0.23, In | Ven | 0 |
| *Cladonia humilis* | Dimorphic | 0.00 | 0.00 | 0.02, In | 0.004, In | Ven | 0 |
| *Cladonia isabellina* | Dimorphic | 0.00 | 0.00 | 0.00 | 0.17, In | 0 | 0 |
| *Cladonia* sp. | Dimorphic | 0.00 | 0.00 | FS | 0.00 | 0 | 0 |
| *Cladonia subsquamosa* | Dimorphic | 0.00 | 0.00 | FS | 0.00 | 0 | 0 |
| Graphidaceae | *Diploschistes* aff. *scruposus* | Crustose | 0.00 | 0.00 | 0.00 | 0.67, In | Ven | ? |
| Hygrophoraceae | *Cora squamiformis* | Foliose | 0.00 | 0.00 | 0.44, In, FS, BSC | 0.00 | Ven | 0 |
| Hymeneliaceae | *Tremolecia atrata* | Crustose | 0.17, In | 0.80, In, FS | 2.83, In, FS | 2.08, In | 0 | 0 |
| Lobariaceae | *Sticta* cf. *paralimbata* | Foliose | 0.00 | 0.00 | 0.00 | 0.13, In | Ven | 0 |
| Parmeliaceae | *Hypotrachyna* aff. *sinuosa* | Foliose | 0.00 | 0.00 | 0.00 | 0.01, In | Ven | ? |
| *Hypotrachyna livida* | Foliose | 0.00 | 0.08, In | 0.00 | 0.00 | Ven | 0 |
| *Hypotrachyna subsaxatilis* | Foliose | 0.00 | 0.00 | 0.26, In | 0.00 | Ven | 0 |
| *Usnea* sp. | Fructiculose | 0.00 | 0.13, In | 0.00 | 0.00 | 0 | 0 |
| *Xanthoparmelia skottsbergiana* | Foliose | 0.00 | 0.63, In, FS | In, FS | In | Ven | 0 |
| *Xanthoparmelia submougeotii* | Foliose | 0.00 | 0.00 | 0.00 | 0.13, In | Ven | 0 |
| Peltigeraceae | *Peltigera ulcerata* | Foliose | 0.01, In | 0.21, In, FS | 0.03, In, BSC | 0.10, In | 0 | 0 |
| Psoraceae | *Psora* sp. | Foliose | 0.00 | 0.00 | FS, BSC | 0.00 | 0 | ? |
| Rhizocarpaceae | *Rhizocarpon geographicum* | Crustose | 0.00 | 0.21, In, FS | 0.80, In, FS | 0.23, In | Ven | 0 |
| *Rhizocarpon umbilicatum* | Crustose | 9.04 | 13.50 | 2.19 | 1.21 | Ven | 0 |
| Stereocaulaceae | *Lepraria albicans* | Fructiculose | 0.00 | 0.00 | FS | 0.00 | Ven | 0 |
| *Lepraria caesioalba* | Crustose | 0.00 | 0.00 | 0.38, In | 0.00 | Ven | 0 |
| *Lepraria* cf. *caesioalba* | Crustose | 0.00 | 0.00 | 0.04, In | 0.00 | Ven | 0 |
| *Lepraria* cf. *neglecta* | Crustose | In | 0.21, In | 0.55, In, BSC | 0.08, In | Ven | 0 |
| *Leprocaulon congestum* | Fructiculose | 0.00 | 0.00 | 0.01, In | 0.00 | 0 | 0 |
| *Leprocaulon gracilescens* | Fructiculose | 0.00 | 0.00 | In | 0.00 | Ven | 0 |
| *Leprocaulon subalbicans* | Fructiculose | 0.00 | 0.00 | In | 0.00 | Ven | 0 |
| *Stereocaulon* cf. *vesuvianum* | Fructiculose | 0.00 | 0.00 | 0.01, In | 0.00 | 0 | 0 |
| *Stereocaulon delisei* | Fructiculose | 0.00 | 0.00 | 0.00 | 0.08, In | Ven | 0 |
| *Stereocaulon glareosum* | Fructiculose | 3.13, In | 12.29, In, FS, BSC | 0.02, In, FS, BSC | 1.7, In | Ven | 0 |
| *Stereocaulon ramulosum* | Fructiculose | 0.00 | 0.13, In | 0.08, In | 0.02, In | 0 | 0 |
| *Stereocaulon* sp. 1 | Fructiculose | 0.00 | 0.00 | In | In | 0 | 0 |
| *Stereocaulon* sp. 2 | Fructiculose | 0.00 | 0.02, In | In | 0.13, In | 0 | 0 |
| *Stereocaulon verruciferum* | Fructiculose | 0.00 | 0.04, In, FS, BSC | 2.43, In, FS, BSC | 0.42, In | 0 | 0 |
| *Stereocaulon vesuvianum* | Fructiculose | 0.00 | 0.00 | In | 0.03, In | 0 | 0 |
| Trapeliaceae | *Placopsis contortuplicata* | Foliose | 1.28, In | 0.77, In, FS, BSC | 0.01, in, FS, BSC | 0.45, In | Ven | 0 |
| *Placopsis dusenii* | Foliose | 0.00 | 0.00 | 0.00 | 0.13, In | Ven | 0 |
| *Placopsis* sp. | Foliose | 0.00 | 0.00 | 0.04, In | 0.00 | 0 | 0 |
| Umbilicariaceae | *Umbilicaria africana* | Foliose | 0.00 | 0.04, In | 0.01, In, FS | 0.01, In | 0 | 0 |
| *Umbilicaria polyrrhiza* | Foliose | 0.00 | 0.00 | 0.13, In | 0.00 | 0 | 0 |
| NoID | Cianolichen sp. 1 | Foliose | In | 0.00 | BSC | 0.00 | ? | 0 |
| NoID | Cianolichen sp. 2 | Foliose | 0.00 | 0.00 | BSC | 0.00 | ? | 0 |
| Bryophyte | Andreaeaceae | *Andreaea acutifolia* | Small cushion | 0.003, In | 0.00 | 1.08, In, FS, BSC | 0.20, In | Ven | 0 |
| *Andreaea rupestris* | Small cushion | In | 0.08, In | 0.31, In, FS, BSC | 0.28, In | 0 | 0 |
| *Andreaea* sp. | Small cushion | 0.00 | In | 0.19, In | 0.13, In | 0 | 0 |
| Bartramiaceae | *Bartramia brevifolia* | Short turf | 0.00 | 0.00 | 0.23, In | 0.00 | 0 | 0 |
| *Bartramia longifolia* | Tall turf | 0.00 | 0.00 | FS | 0.01, In | 0 | 0 |
| *Bartramia mathewsii* | Short turf | 0.00 | 0.00 | 0.03, In | 0.00 | 0 | 0 |
| *Bartramia potosica* | Short turf | 0.00 | In | 0.13, In | 0.02, In | 0 | 0 |
| *Bartramia potosica* var. *synoica* | Short turf | 0.00 | 0.00 | FS, BSC | 0.00 | 0 | 0 |
| Brachytheciaceae | *Brachythecium praelongum* | Loose mat | 0.00 | 0.00 | 0.21, In | In | 0 | TA |
| Bryaceaea | *Anomobryum julaceum* | Short turf | 0.00 | 0.13, In | 0.08, In, BSC | 0.52, In | 0 | 0 |
| *Bryum andicola* | Short turf | 0.00 | 0.15, In, FS, BSC | BSC | 0.00 | 0 | 0 |
| *Bryum argentium* | Short turf | 0.06, In | In | 0.00 | 0.03, In | 0 | 0 |
| *Bryum* cf. *chryseum* | Short turf | 0.00 | FS, BSC | FS | 0.00 | 0 | 0 |
| *Bryum* cf. *dichotomum* | Short turf | 0.05, In | 0.00 | 0.00 | 0.00 | 0 | 0 |
| *Bryum* cf. *lymbatum* | Short turf | 0.00 | 0.01, In | 0.00 | 0.00 | 0 | 0 |
| *Bryum chryseum* | Short turf | 0.25, In | 0.68, In, BSC | 0.02, In | 0.05, In | 0 | 0 |
| *Pholia papillosa* | Open turf | 0.00 | 0.00 | 0.00 | 0.06, In | 0 | 0 |
| Cephaloziellaceae | *Cephaloziella* cf. *fragillima* | Thread like mat | In | 0.16, In | In, BSC | 0.22, In | 0 | 0 |
| Dicranaceae | *Aognstroemia julacea* | Open turf | 0.00 | 0.00 | 0.81, In, FS, BSC | 0.43, In | 0 | 0 |
| *Campylopus amboroensis* | Dense turf | 0.023, In | 0.00 | 0.00 | 0.00 | 0 | TA |
| *Campylopus areodictyon* | Open turf | 0.00 | 0.00 | 0.00 | 0.03, In | 0 | TA |
| *Campylopus flexuosus* var. *flexuosus* | Open turf | 0.00 | 0.78, In, FS, BSC | 0.90, In, FS, BSC | 0.01, In | 0 | 0 |
| *Campylopus fragilis* | Dense turf | 0.00 | 0.21, In, FS, BSC | 0.43, In, BSC | 0.27, In | 0 | 0 |
| *Dicranella* cf. *callosa* | Short turf | In, FS | 0.18, In | 0.06, In | 0.00 | Ven | 0 |
| *Dicranella vaginata* | Short turf | 0.05, In | 0.33, In | In | 0.04, In | Ven | 0 |
| *Oreiweisia brasilensis* | Open turf | 0.00 | In | 0.00 | 0.00 | 0 | 0 |
| Ditrichaceae | *Ditrichum crinale* | Open turf | 0.00 | 0.00 | 0.00 | 0.17, In | 0 | TA |
| Grimmiaceae | *Grimmia atrata* | Small cushion | 0.04, In, FS | BSC | 0.15, In, BSC | 0.01, In | Ven | 0 |
| *Grimmia australasiae* | Small cushion | 0.00 | 0.00 | 0.14, In | 0.00 | 0 | TA |
| *Grimmia austrofunalis* | Small cushion | 0.00 | 0.00 | In | 0.00 | 0 | TA |
| *Grimmia* cf. *austrofunalis* | Small cushion | 0.00 | FS, BSC | FS, BSC | 0.00 | 0 | TA |
| *Grimmia* cf. *elongata* | Small cushion | 0.00 | 0.00 | FS, BSC | 0.00 | 0 | 0 |
| *Grimmia* cf. *sessitana* | Small cushion | 0.00 | 0.00 | In | 0.00 | 0 | 0 |
| *Grimmia* cf. *tortuosa* | Small cushion | 0.08, In | 0.02, In | FS | 0.00 | 0 | 0 |
| *Grimmia elongata* | Small cushion | 0.00 | 0.08, In | 0.19, In | 0.80, In | 0 | 0 |
| *Grimmia fusculutea* | Small cushion | 0.09, In | 0.39, In | 0.18, In | 0.00 | 0 | 0 |
| *Grimmia longirostris* | Small cushion | 0.00 | 0.004, In, FS, BSC | 0.73, In, FS | 0.16, In | 0 | 0 |
| *Racomitrium crispipilum* | Dense mat | 0.19, In | 2.78, In, FS, BSC | 1.50, In, FS, BSC | 3.29, In | 0 | 0 |
| *Racomitrium subsecundum* | Dense mat | 0.05, In | 2.52, In, FS, BSC | 2.31, In, FS, BSC | 7.92, In | 0 | 0 |
| Gymnomitriaceae | *Gymnomitrium* sp. | Dense mat | 0.00 | 0.00 | 0.00 | 0.004, In | 0 | 0 |
| *Marsupella* sp. | Dense mat | 0.00 | FS, BSC | In, FS, BSC | 0.02, In | 0 | 0 |
| Jungermanniaceae | *Anastrophyllum* sp. | Loose mat | 0.00 | 0.04, In | 0.13, In | 1.80, In | 0 | 0 |
| Lepidoziaceae | *Kurzia* sp. | Thread like mat | 0.00 | 0.00 | 0.00 | In | 0 | 0 |
| Metzgeriaceae | *Metzgeria* sp. | Loose mat | 0.00 | 0.00 | 0.00 | 0.04, In | 0 | 0 |
| Mniaceae | *Schizimenium* sp. | Dense turf | 0.00 | 0.00 | 0.00 | 0.01, In | 0 | 0 |
| Orthotrichaceae | *Orthotrichum pycnophyllum* | Open turf | 0.00 | 0.00 | 0.33, In | 0.00 | 0 | 0 |
| *Zygodon pichinchensis* | Dense turf | 0.00 | 0.17, In, FS | 1.00, In, FS | 0.17, In | 0 | 0 |
| Polytrichaceae | *Polytrichum juniperinum* | Tall turf | 0.05, In | 0.59, In, FS, BSC | In, FS, BSC | 0.15, In | 0 | 0 |
| Pottiaceae | *Didymodon australasiae* | Small cushion | 0.00 | 0.00 | 0.00 | 0.05, In | 0 | 0 |
| *Leptodontium* cf. *syntrichioides* | Short turf | 0.00 | BSC | BSC | 0.00 | Ven | 0 |
| *Leptodontium erythoneuron* | Short turf | 0.00 | 0.00 | 0.00 | In | 0 | TA, P |
| *Leptodontium flexifolium* | Short turf | 0.00 | 0.01, In | 0.00 | 0.13, In | 0 | 0 |
| *Leptodontium syntrichioides* | Short turf | 0.00 | In | 0.00 | In | Ven | 0 |
| *Molendoa peruviana* | Dense turf | 0.23, In | 0.21, In | In | 0.00 | 0 | 0 |
| *Syntrichia andicola* | Short turf | 0.00 | 0.00 | 0.00 | 0.01, In | 0 | 0 |
| Vascular plants | Asteraceae | *Baccharis tricuneata* | Shrub | 0.00 | 0.00 | 0.00 | In | 0 | 0 |
| *Belloa kunthiana* | Herb | 0.00 | 0.00 | 0.00 | 0.06, In | 0 | 0 |
| *Belloa radians* | Herb | 0.00 | 0.00 | 0.00 | In | 0 | P |
| *Espeletia moritziana* | Caulescent rossette | 0.00 | 0.00 | 0.00 | 2.00, In | 0 | Ven, P |
| *Espeletia palustris* | Caulescent rossette | 0.00 | 0.00 | 0.00 | 0.13, In | 0 | Ven, P |
| *Gnaphalium meridanum* | Herb | 0.00 | 0.00 | 0.00 | In | 0 | P |
| *Hieracium frigidum* | Herb | 0.00 | 0.00 | 0.00 | 0.31, In | 0 | P |
| *Hinterhubera ericoides* | Shrub | 0.00 | 0.00 | In | 0.13, In | 0 | P |
| *Hypochaeris sessiliflora* | Acaulescent rosette | 0.00 | 0.13, In | 0.03, In | 1.81, In | 0 | P |
| *Lasiocephalus longipenicillatus* | Herb | In | 0.25, In | 0.03, In | 0.59, In | 0 | P |
| *Luciliocline longifolia* | Herb | 0.00 | 0.00 | 0.00 | In | 0 | P |
| *Pentacalia andicola* | Shrub | 0.00 | 0.00 | 0.00 | 3.53, In | 0 | P |
| *Pentacalia imbricatifolia* | Shrub | In | 0.00 | 0.03, In | 8.78, In | 0 | Ven, P |
| *Senecio wedglacialis* | Herb | 0.00 | 0.00 | 0.00 | 2.40, In | 0 | 0 |
| Brassicaceae | *Draba bellardii* | Acaulescent rosette | 0.00 | 0.00 | In | 0.00 | 0 | Ven, P |
| *Draba pulvinata* subsp. *pulvinata* | Shrub | 0.00 | 0.00 | In | 0.00 | 0 | Ven, P |
|  | *Draba lindenii* | Shrub | 0.00 | 0.00 | In | 0.00 | 0 | Ven, P |
| Caprifoliaceae | *Valeriana spicata* | Shrub | 0.00 | 0.00 | 0.00 | In | 0 | P |
| Caryophyllaceae | *Arenaria musciformis* | Cushion | 0.00 | 0.00 | 0.03, In | 0.63, In | 0 | P |
| *Cerastium cephalanthum* | Herb | 0.00 | 0.00 | 0.00 | In | 0 | P |
| Dryopteridaceae | *Elaphoglossum mathewsii* | Fern | 0.00 | 0.00 | 0.00 | In | 0 | 0 |
| *Polystichum orbiculatum* | Fern | 0.00 | 0.00 | In | In | 0 | 0 |
| Gentianaceae | *Halenia viridis* | Herb | 0.00 | 0.00 | 0.00 | 0.28, In | 0 | P |
| Hypericaceae | *Hypericum brathys* | Shrub | 0.00 | 0.00 | 0.00 | In | 0 | P |
| Lycopodiaceae | *Lycopodium clavatum* | Fern | 0.00 | 0.00 | 0.00 | 0.94, In | 0 | 0 |
| Onagraceae | *Oenothera epilobifolia* | Acaulescent rosette | 0.00 | 0.00 | 0.00 | 0.09, In | 0 | 0 |
| Orobanchaceae | *Bartsia laniflora* | Herb | 0.00 | 0.00 | 0.00 | 0.06, In | 0 | P |
| *Castilleja fissifolia* | Herb | 0.00 | 0.00 | 0.00 | 2.19, In | 0 | 0 |
| Poaceae | *Agrostis tolucensis* | Grass | 0.00 | 0.00 | In | 0.94, In | 0 | 0 |
| *Calamagrostis pisinna* | Grass | 0.00 | 0.00 | In | 0.84, In | 0 | Ven, P |
| *Cortaderia hapalotricha* | Grass | 0.00 | 0.00 | 0.00 | 0.06, In | 0 | 0 |
| *Festuca fragilis* | Grass | 0.00 | 0.31, In | 0.53, In | 5.63, In | 0 | P |
| *Poa petrosa* | Grass | 0.38, In | 1.75, In | 2.75, In | 0.41, In | 0 | P |
| *Poa trachyphylla* | Grass | 0.00 | 0.13, In | 0.35, In | 1.03, In | 0 | P |
| Polypodiaceae | *Melpomene moniliformis* | Fern | 0.00 | 0.00 | 0.06, In | 0.06, In | 0 | 0 |
| Rosaceae | *Lachemilla polylepis* | Shrub | 0.00 | 0.00 | 0.00 | In | 0 | 0 |
| *Lachemilla ramosissima* | Herb | 0.00 | 0.00 | 0.00 | 0.06, In | 0 | P |
